# Supplementary material
Source: publisher site journal article supplement (https://www.spandidos-publications.com/3078/downloadSupplementary)

Figure S1. Analysis of total ginsenoside extract of ginseng root. (A) Standard chromatogram. (B) Sample chromatogram.

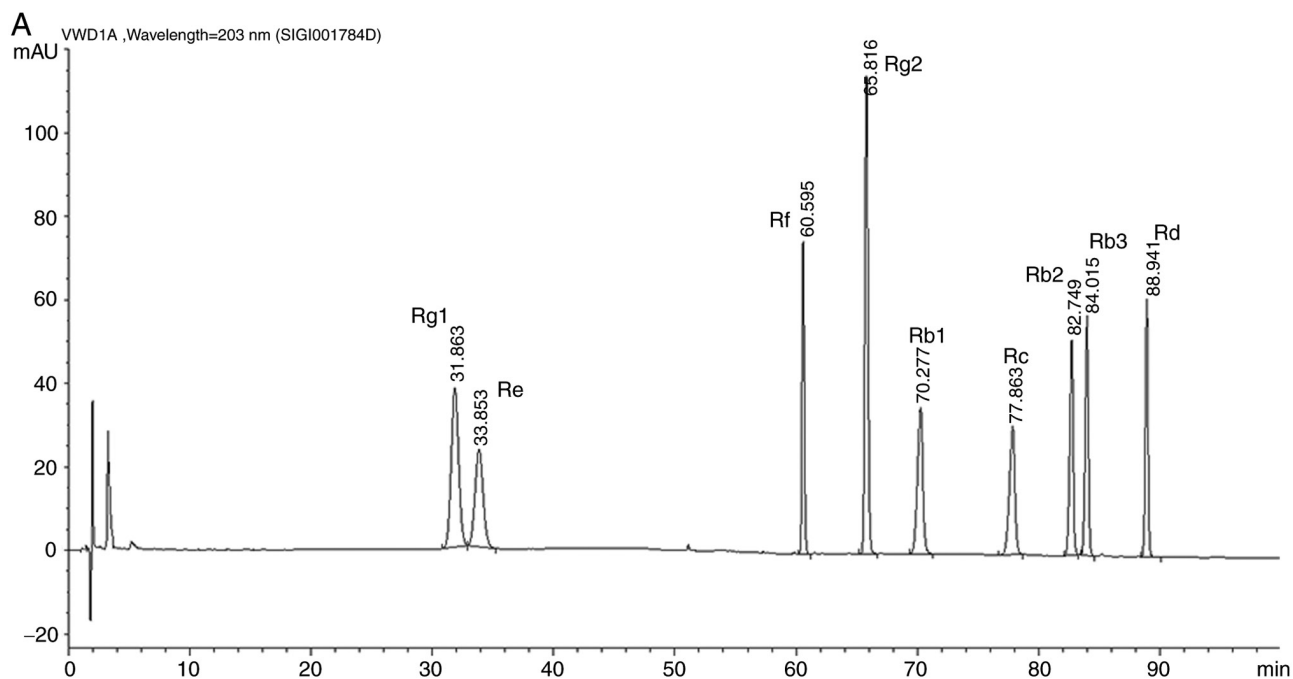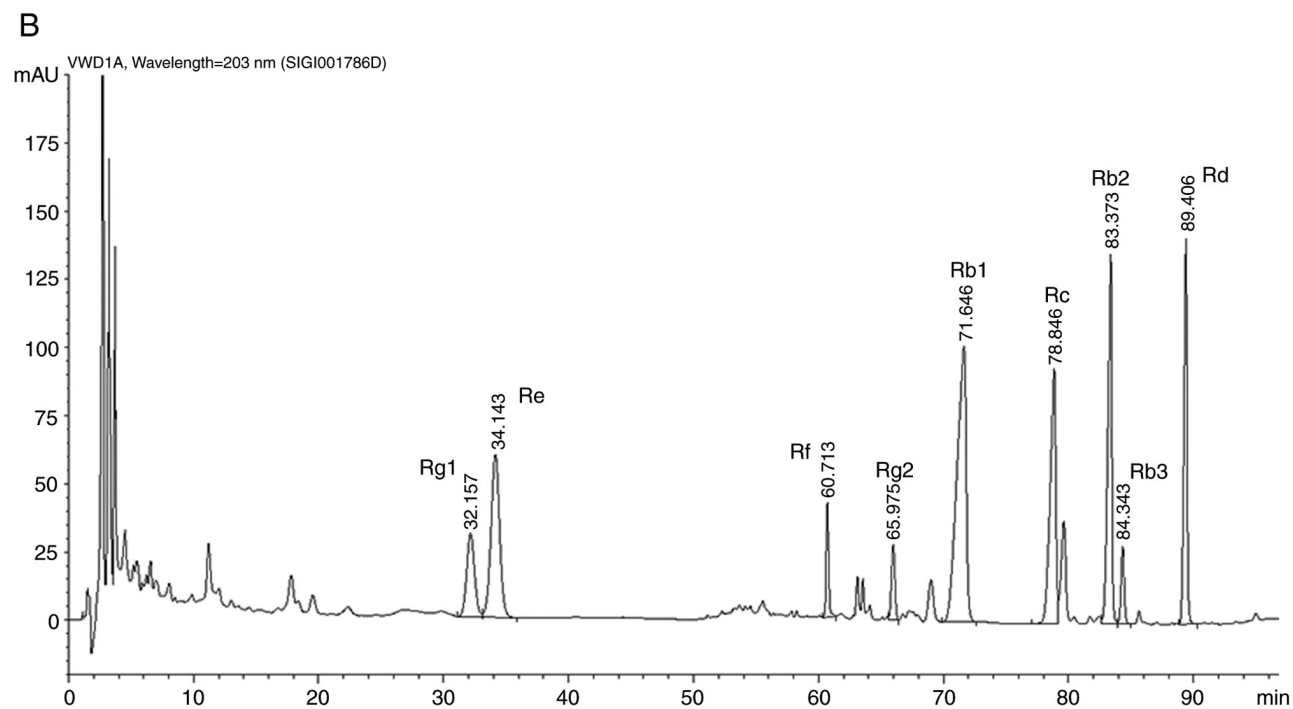

Figure S2. TGN increased transcription of p62 independent of autophagy. (A) Western blot analysis with antibodies specific for p62 and tubulin serving as the control. (B) After HeLa cells were treated with 80  $\mu\text{g/ml}$  TGN, the expression of p62 was determined by reverse transcription-quantitative PCR. (C) After HeLa cells were treated with TGN and DMSO or 80 nM actinomycin D for 16 h, the expression of p62 was determined by western blotting. (D) Statistical analysis of western blot results. \* $P<0.05$ , \*\* $P<0.01$ , \*\*\* $P<0.001$  and \*\*\*\* $P<0.0001$  vs. DMSO. TGN, total ginsenoside; 3-MA, 3-methyladenine; DMSO, dimethylsulfoxide.

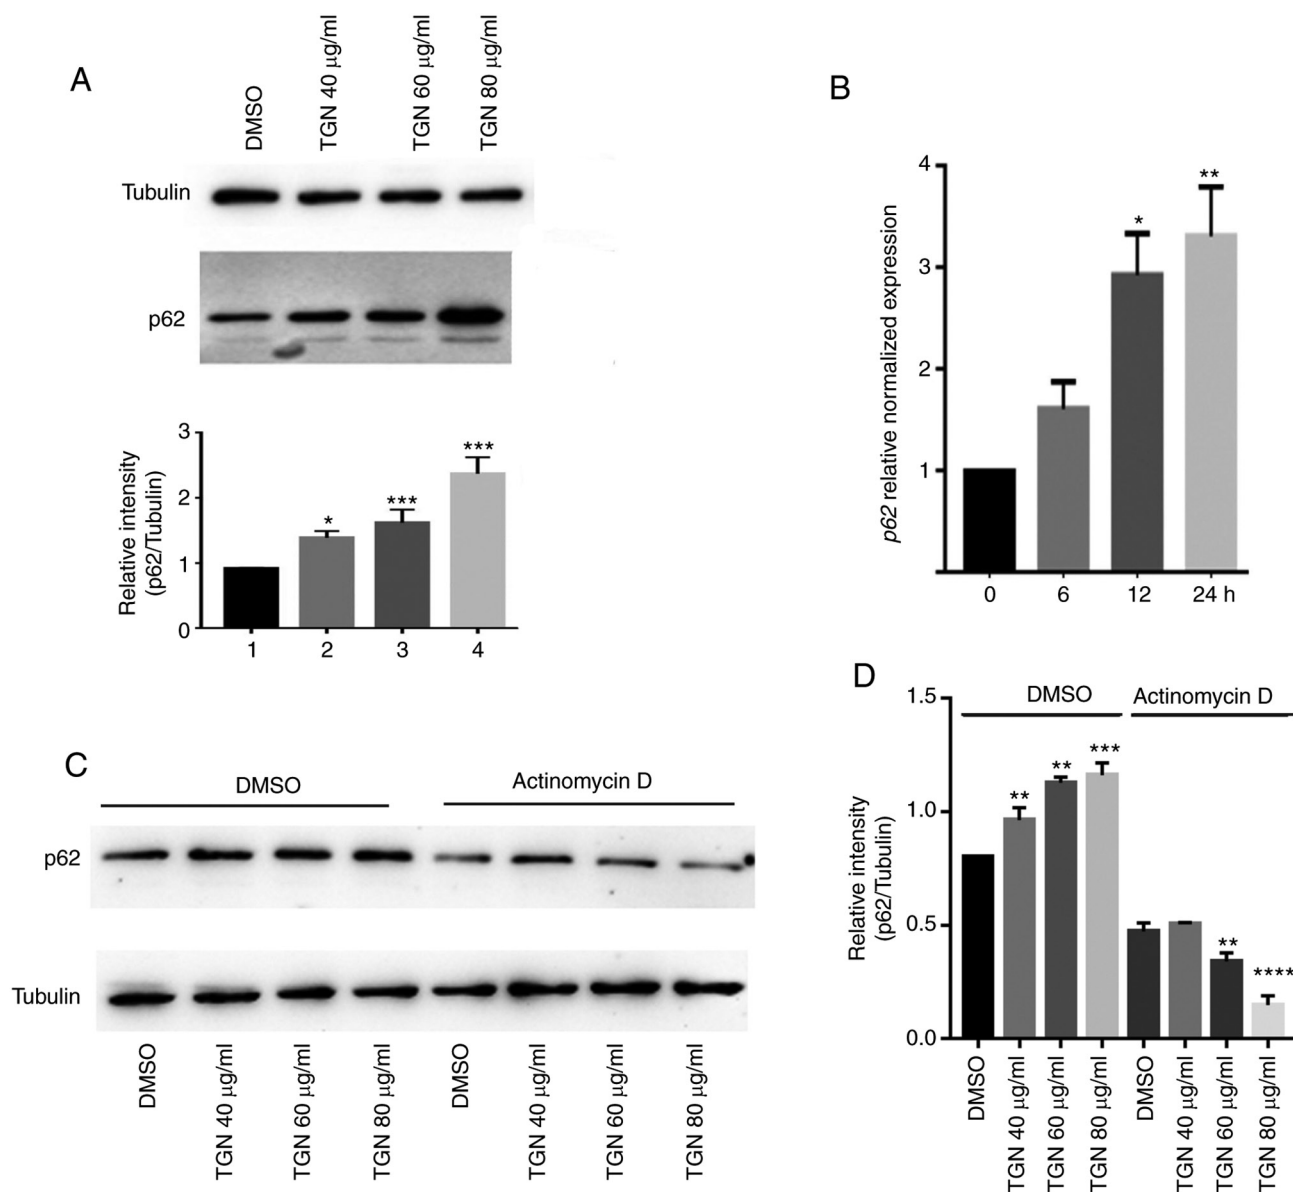

Supplement: Supplementary file 1 [file downloadSupplementary]
